# Supplementary material
Source: MDPI journal article supplement (https://www.mdpi.com/2073-4433/13/2/344)
Supplement: s1 [file s1]

**Table S1.** List of in situ rainfall stations from UNASAM and SENAMHI. \* indicates stations with the same positions for both.

| <b>UNASAM N°</b>  | <b>Name</b>    | <b>Lat.</b> | <b>Lon.</b> | <b>Alt. (m)</b> | <b>Freq.</b> |
|-------------------|----------------|-------------|-------------|-----------------|--------------|
| <b>1</b>          | Nepena         | -9.18       | -78.37      | 125             | hourly       |
| <b>3</b>          | Casma          | -9.48       | -78.24      | 133             | hourly       |
| <b>10</b>         | Huarmey        | -10.06      | -78.14      | 18              | hourly       |
| <b>13*</b>        | Ocros          | -10.41      | -77.40      | 3268            | hourly       |
| <b>14*</b>        | Chiquian       | -10.15      | -77.15      | 3405            | hourly       |
| <b>16</b>         | Pasto Ruri     | -9.89       | -77.30      | 4145            | hourly       |
| <b>19</b>         | Quillcayhuanca | -9.50       | -77.42      | 3850            | hourly       |
| <b>20*</b>        | Shancayan      | -9.52       | -77.52      | 3091            | hourly       |
| <b>21</b>         | Purhuay        | -9.31       | -77.21      | 3480            | hourly       |
| <b>22</b>         | Chacas         | -9.17       | -77.45      | 3770            | hourly       |
| <b>23</b>         | Shilla         | -9.23       | -77.62      | 3040            | hourly       |
| <b>24</b>         | Tingua         | -9.22       | -77.69      | 2500            | hourly       |
| <b>26</b>         | Canasbamba     | -9.10       | -77.77      | 2350            | hourly       |
| <b>27</b>         | San Nicolas    | -8.98       | -77.18      | 2786            | hourly       |
| <b>30</b>         | Corongo        | -8.57       | -77.90      | 3172            | hourly       |
| <b>SENAMHI N°</b> | <b>Name</b>    | <b>Lat.</b> | <b>Lon.</b> | <b>Alt. (m)</b> | <b>Freq.</b> |
| <b>2</b>          | Buena Vista    | -9.43       | -78.21      | 213             | daily        |
| <b>4</b>          | Chacchan       | -9.54       | -77.78      | 2266            | daily        |
| <b>5</b>          | Pira           | -9.59       | -77.71      | 3625            | daily        |
| <b>6</b>          | Cajamarquilla  | -9.63       | -77.74      | 3286            | daily        |
| <b>7</b>          | Pariacoto      | -9.55       | -77.89      | 1312            | daily        |
| <b>8</b>          | Aija           | -9.78       | -77.61      | 3508            | daily        |
| <b>9</b>          | Malvas         | -9.93       | -77.66      | 2979            | daily        |
| <b>11</b>         | Chamana        | -10.21      | -77.56      | 1260            | daily        |
| <b>12</b>         | Mayorarca      | -10.16      | -77.35      | 3335            | daily        |
| <b>13*</b>        | Ocros          | -10.40      | -77.40      | 3249            | daily        |
| <b>14*</b>        | Chiquian       | -10.15      | -77.16      | 3386            | daily        |
| <b>15</b>         | Milpo          | -9.88       | -77.23      | 4400            | daily        |

|     |                         |       |        |      |       |
|-----|-------------------------|-------|--------|------|-------|
| 17  | Recuay                  | -9.73 | -77.45 | 3431 | daily |
| 18  | Chavin                  | -9.59 | -77.18 | 3140 | daily |
| 20* | SantiagoAntunezDeMayolo | -9.52 | -77.52 | 3079 | daily |
| 25  | Yungay                  | -9.14 | -77.75 | 2466 | daily |
| 28  | Pomabamba               | -8.82 | -77.46 | 2985 | daily |
| 29  | Sihuas                  | -8.57 | -77.65 | 2716 | daily |
| 31  | Cabana                  | -8.39 | -78.00 | 3364 | daily |
